# Supplementary material for: Crystal structure of the putative cyclase IdmH from the indanomycin nonribosomal peptide synthase/polyketide synthase
Source: PubMed Central journal article supplement (PMC6830212; doi:10.1107/s2052252519012399), 2019-10-24
Supplement: m-06-01120-sup1.pdf [file m-06-01120-sup1.pdf]

# IUCrJ

**Volume 6 (2019)**

**Supporting information for article:**

**Crystal structure of the putative cyclase IdmH from the  
indanomycin NRPS/PKS**

**Ieva Drulyte, Jana Obajdin, Chi H. Trinh, Arnout P. Kalverda, Marc van der Kamp, Glyn  
R. Hemsworth and Alan Berry**

|                                |            |            |            |            |            |
|--------------------------------|------------|------------|------------|------------|------------|
|                                | 10         | 20         | 30         | 40         | 50         |
| This paper (WT)                | GSHMAHQPSD | TIAGLYEAFN | SGDLETLREL | IAPDAVIHLP | GTAGDAEHPP |
| This paper ( $\Delta 99-107$ ) | GSHMAHQPSD | TIAGLYEAFN | SGDLETLREL | IAPDAVIHLP | GTAGDAEHPP |
| ACN69984.1                     | MAHQPSD    | TIAGLYEAFN | SGDLETLREL | IAPDAVIHLP | GTAGDAEHPP |
|                                | 60         | 70         | 80         | 90         | 100        |
| This paper (WT)                | GTPRDREGWL | GVWQFTQAFF | PDMTATVQDI | VQTGDLVATR | CVARGTHSIE |
| This paper ( $\Delta 99-107$ ) | GTPRDREGWL | GVWQFTQAFF | PDMTATVQDI | VQTGDLVATR | CVARGTHS-- |
| ACN69984.1                     | GTPRDREGWL | GVWQFTQAFF | PDMTATVQDI | VQTGDLVATR | CVARGTHSIE |
|                                | 110        | 120        | 130        | 140        |            |
| This paper (WT)                | FMGVPPTGRP | FEMTMLNMSR | VRDGRIVEHW | TISDNVTMLA | QLGVKASL   |
| This paper ( $\Delta 99-107$ ) | -----GRP   | FEMTMLNMSR | VRDGRIVEHW | TISDNVTMLA | QLGVKASL   |
| ACN69984.1                     | FMGVPPTGRP | FEMTMLNMSR | VRDGRIVEHW | TISDNVTMLA | QLGVKASL   |

**Figure S1** Protein sequences and numbering of IdmH. IdmH is predicted to be a 145-residue protein from the Uniprot database (ACN69984.1). During the cloning and expression of IdmH reported in this paper, a hexa-histidine tag for purification followed by a thrombin cleavage site was added. Following purification on a 5 ml HisTrap HP column (GE Healthcare, USA), thrombin cleavage produced a ‘wild-type’ IdmH protein of 148 residues (listed above). Throughout this paper numbering of residues relates to this thrombin-cleaved wild-type sequence. The  $\Delta 99-107$  variant was also constructed. NMR data were collected for IdmH that had not undergone thrombin cleavage and hence that protein contains an additional N-terminal sequence of GSSHHHHHHGLVPR.



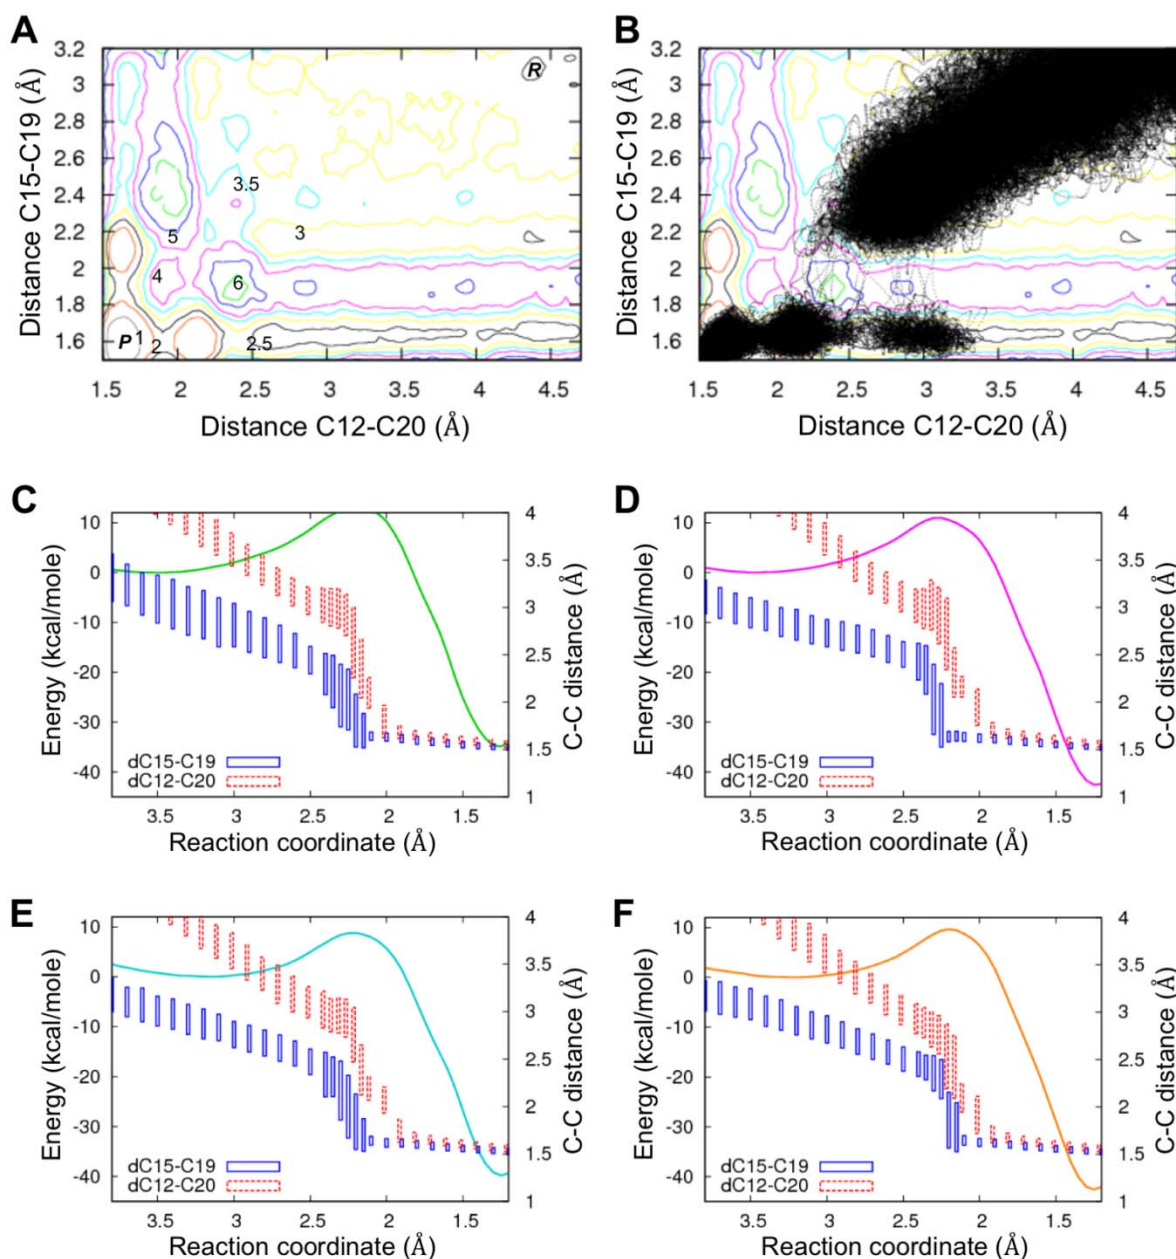

**Figure S3** Analysis of reaction simulations using the approximate 1D reaction coordinate. A) Approximate 2D PMF for pose D, calculated using the carbon-carbon distances as the reaction coordinates for umbrella sampling, with the same simulation details as the 1D umbrella sampling. Contour lines and labels indicate energies in kcal/mole. Reactant (R) and Product (P) minima are indicated. B) Progression of the carbon-carbon distances in the 11 1D-PMF runs for pose D projected on the 2D PMF from panel A. C-F) 1D PMF for poses A, B, C & D (green, magenta, cyan and orange, respectively, to match with Figure 8), with the range of carbon-carbon distances sampled in each window indicated by the average  $\pm$  standard deviation.

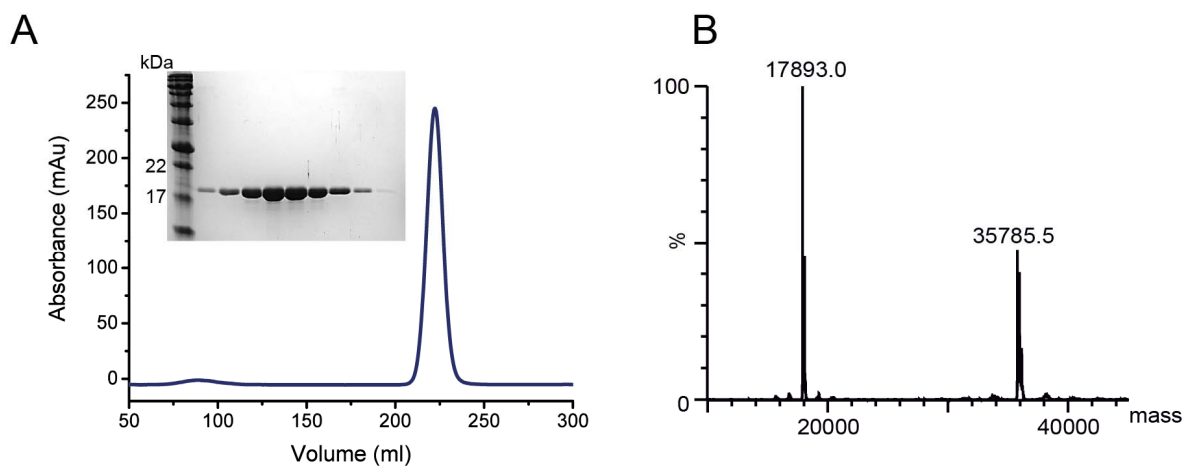

**Figure S4** Purification and characterisation of wild-type IdmH. (a) Purification of IdmH by size-exclusion chromatography. Peak fractions were analysed by SDS-PAGE which shows a single monomeric band for denatured IdmH. (b) Analysis of IdmH oligomerisation state by native liquid chromatography / mass spectrometry. A clear peak for dimeric IdmH indicates the association of IdmH into homo-dimers.

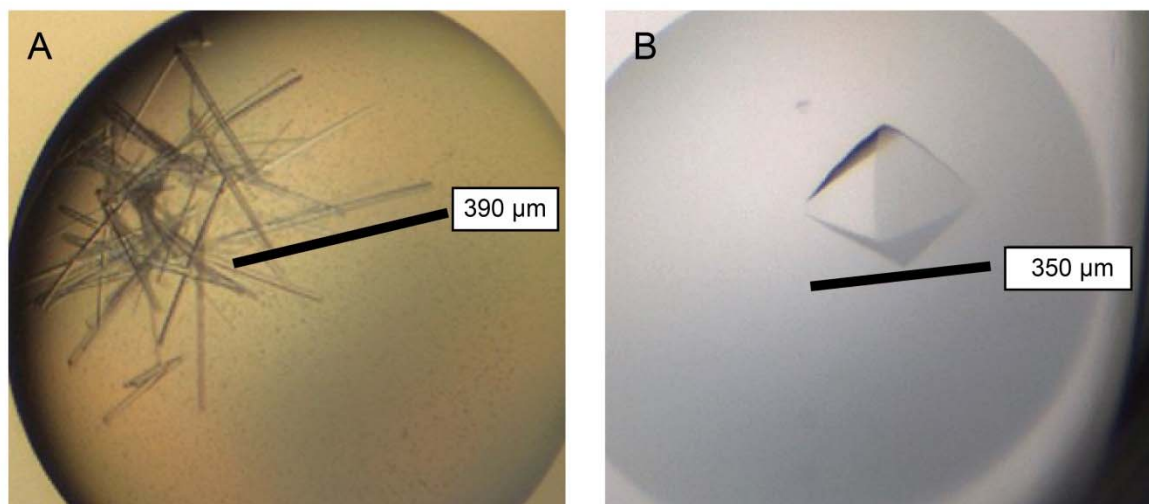

**Figure S5** Crystal morphology of IdmH and IdmH-Δ99-107. (a) Wild-type IdmH crystallised as long rods in the space group  $P12_12$ . (b) IdmH-Δ99-107 resulted in large tetrahedral crystals with a space group  $F23$ .

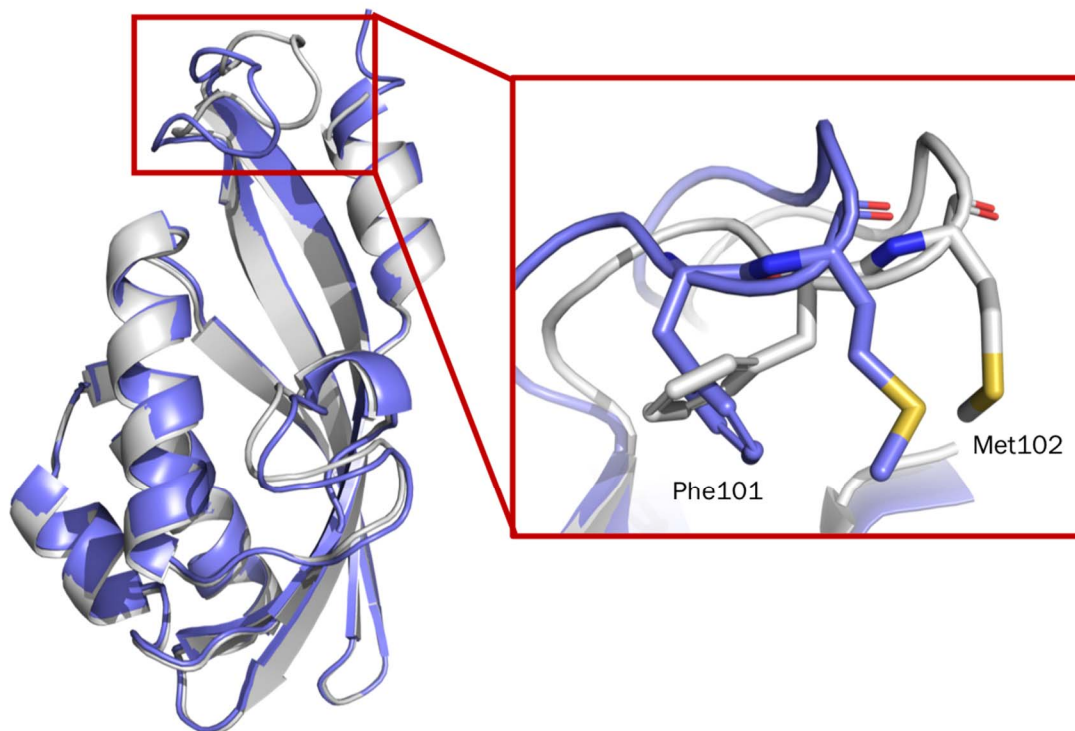

**Figure S6** Conformational differences in the loop comprising residues 99-108. This loop was truncated in IdmH- $\Delta$ 99-107 to aid crystallisation while in the wild-type IdmH structure it has been observed in two distinct conformations between chains A (blue) and B (grey). The inset shows a magnified view of the loop and two amino acids Phe101 and Met102 are shown as sticks.



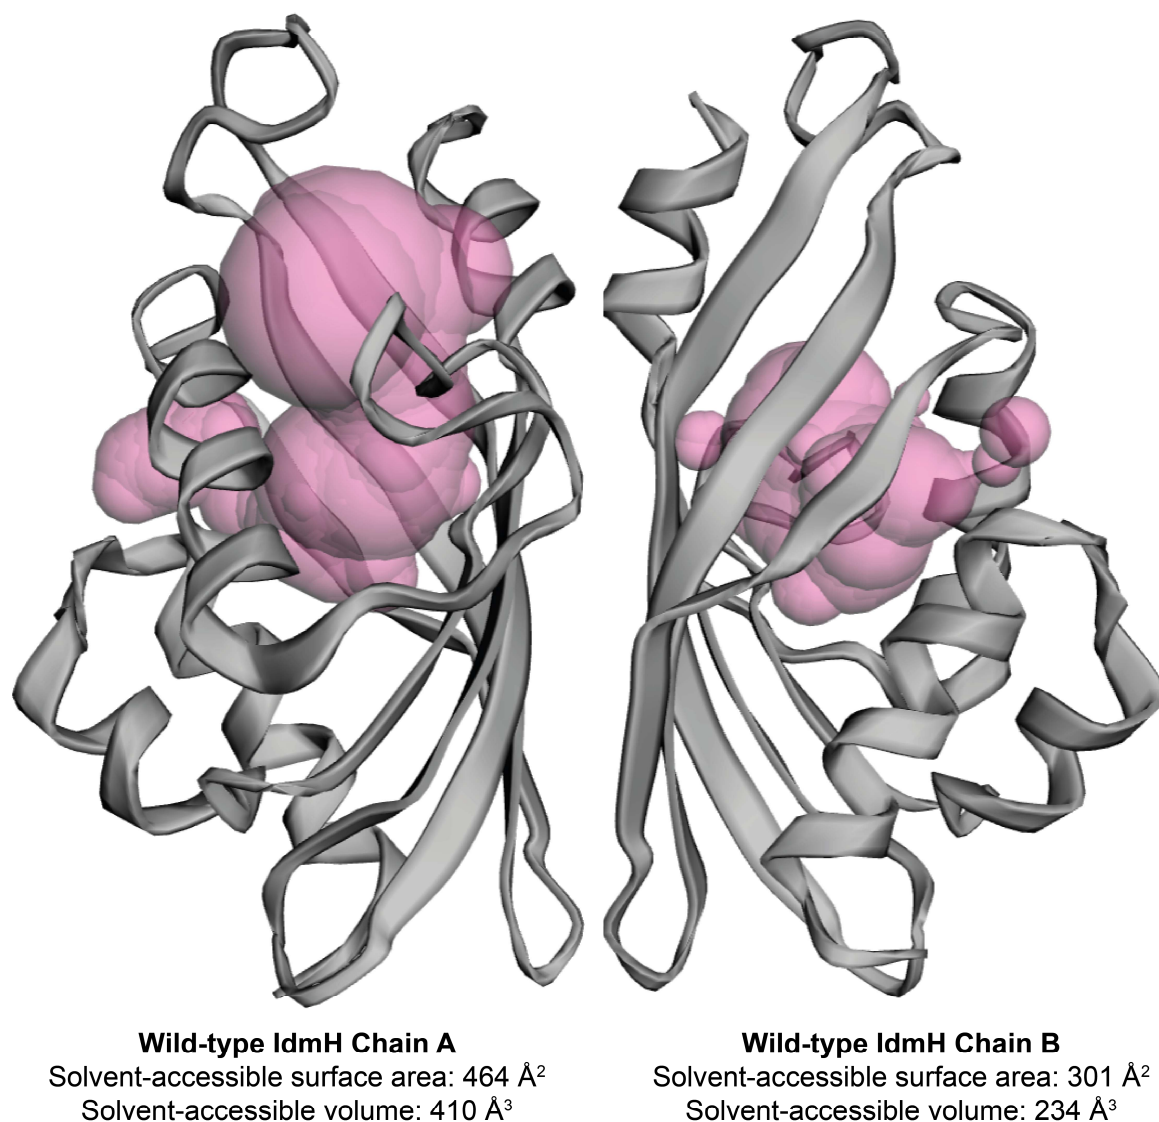

**Figure S7** The solvent-accessible volume (pink) of hydrophobic pockets from IdmH chains A and B, as computed by CASTp 3.0 (Tian *et al* (2018)). The CASTp server describes a pocket as an empty concavity on the protein surface into which solvent with a probe radius of 1.4 Å can gain access. In such pockets the mouth opening of the pocket needs to be smaller than the cross-section of the pocket itself. If the mouth is wider than the pocket cross-section, the cavity is labelled as a shallow depression and is excluded from the solvent-accessible surface area and volume calculations. In chain B of IdmH, the loop capping the pocket is in a more open conformation than in chain A, resulting in part of the chain B pocket becoming labelled as a shallow depression. The volume is therefore excluded from the calculation and is excluded from the area and volume calculations. The pocket in chain B therefore appears smaller on the figure above. This figure however highlights the location of the active site pocket.

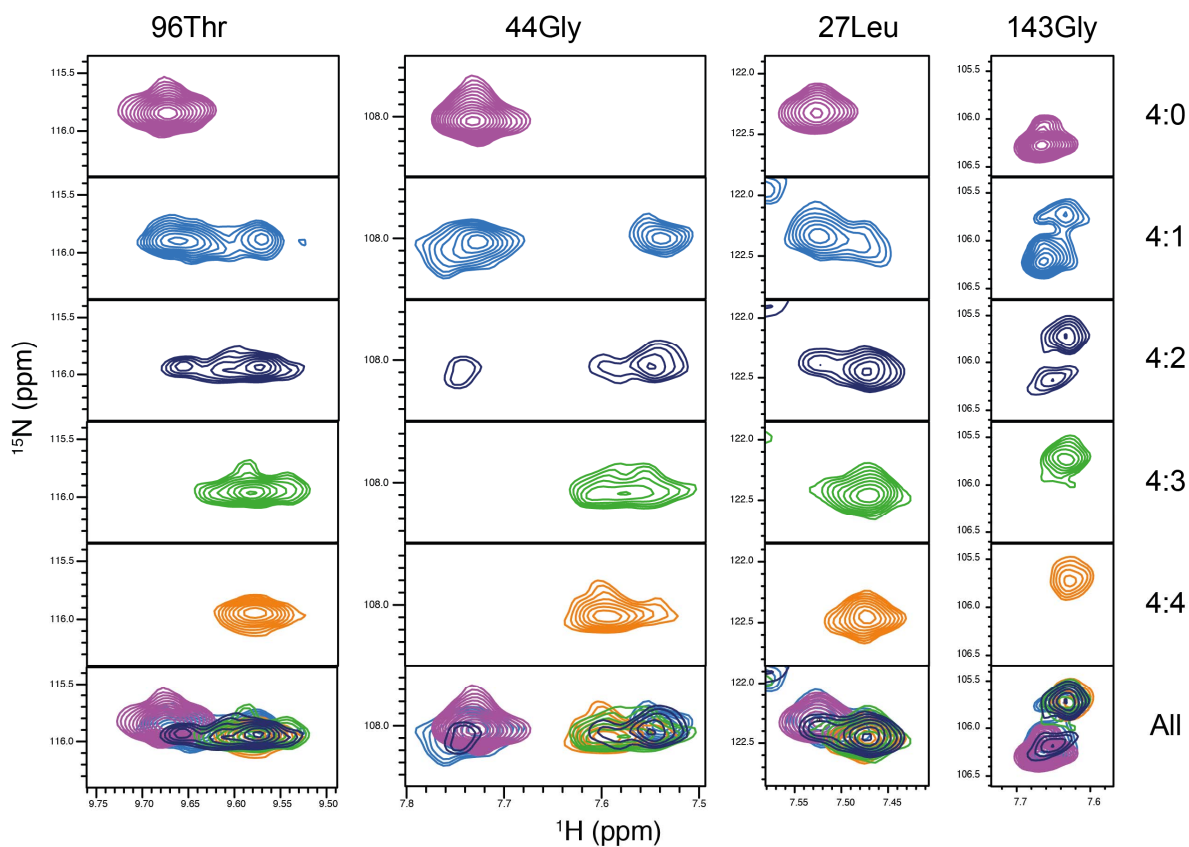

**Figure S8** Chemical shift perturbations for individual residues going from free (purple) to bound (orange) state as recorded in  $^1\text{H}$ - $^{15}\text{N}$  HSQC-TROSY spectra. Peak broadening is observed when in equilibrium between free and bound (4:2 and 4:3 ratios of protein: ligand, dark blue and green, respectively) states. Peaks sharpen up again close to saturation (orange). In all cases, the free peaks decrease in intensity as the bound peaks increase, suggesting a slow exchange.



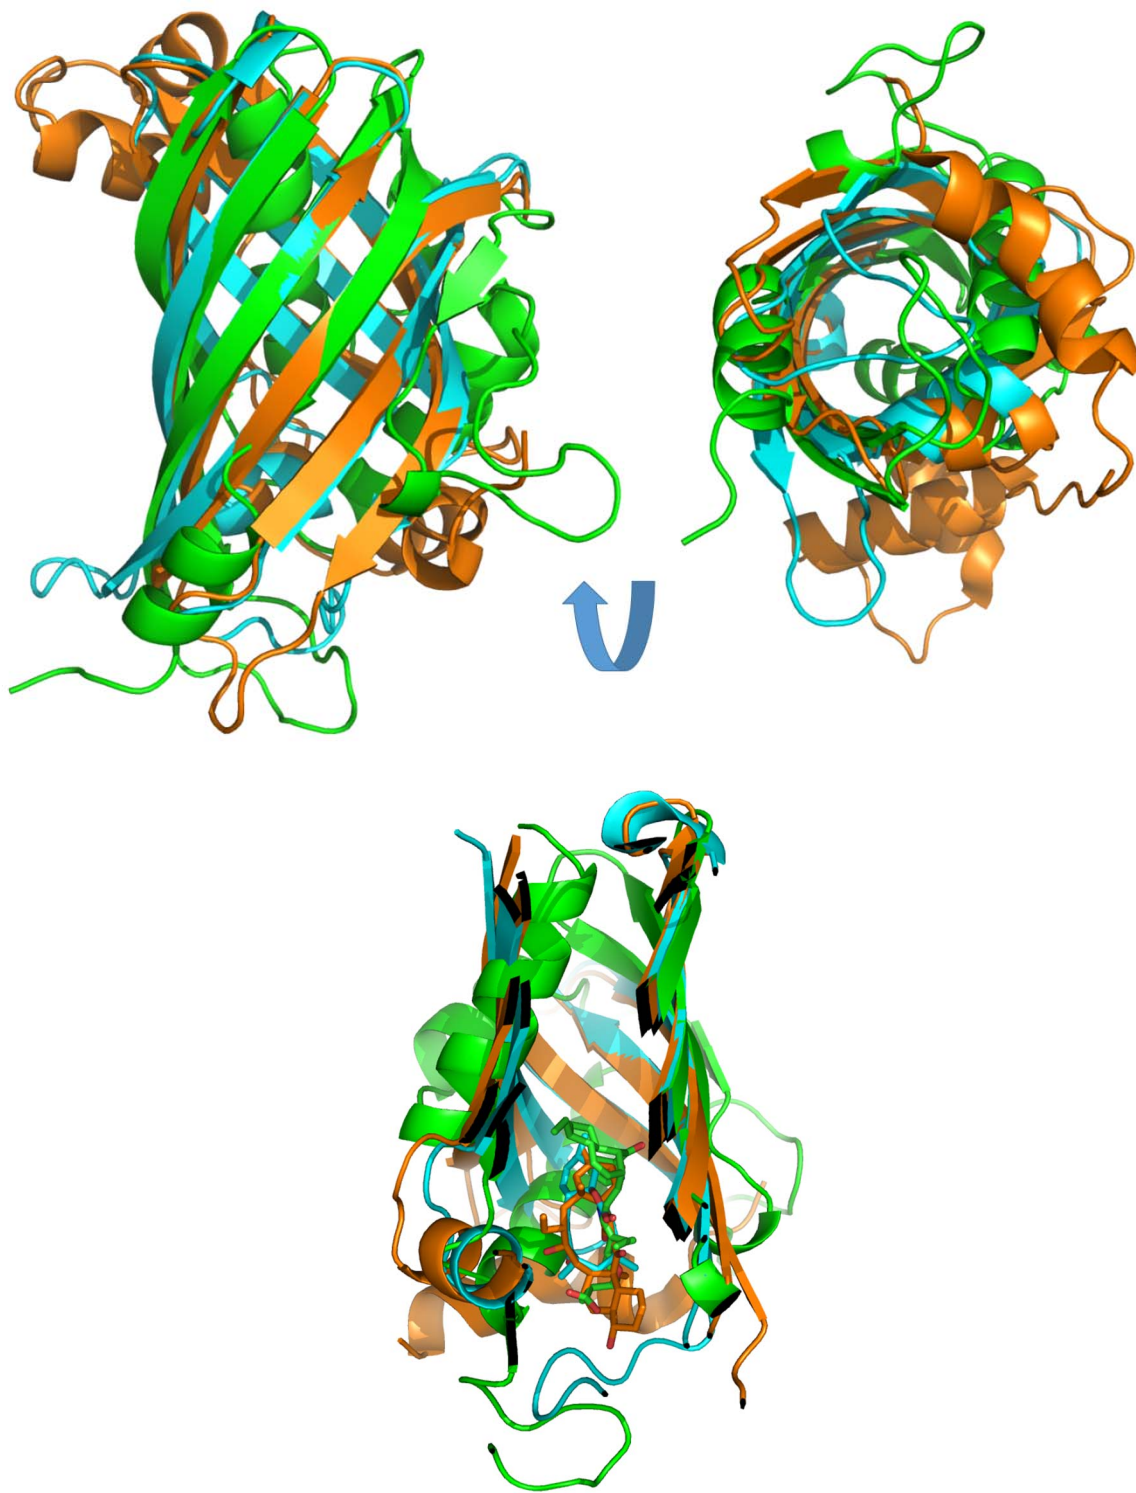

**Figure S9** Comparison of monomers of IdmH (chain A; green), AbyU (PDB 5DYV, chain A; cyan) and PyrI4 (PDB 5BU3, chain A; orange). AbyU and PyrI4 were aligned based on C $\alpha$  RMSD; IdmH was manually positioned to indicate similarity in structure. The bottom panel shows the location of the products, either co-crystallised (PyrI4) or docked (AbyU from (Byrne *et al* (2016)) and IdmH (this work; pose D)).

**Table S1** IdmH variants produced and the outcome.

| <b>Variant</b>             | <b>Justification</b>     | <b>Outcome</b>   |
|----------------------------|--------------------------|------------------|
| E29A                       | Reducing surface entropy | No effect        |
| E47A                       | Reducing surface entropy | No effect        |
| E57A                       | Reducing surface entropy | No effect        |
| E100A                      | Reducing surface entropy | No effect        |
| Residue 49-53 truncation   | Decreasing flexibility   | Insoluble        |
| Residue 99-107 truncation  | Decreasing flexibility   | New crystal form |
| Residue 142-147 truncation | Decreasing flexibility   | Insoluble        |

**Table S2** NMR peak assignment table.

NMR peaks were assigned by labelling IdmH with  $^{13}\text{C}$ ,  $^{15}\text{N}$  and  $^2\text{H}$ , and the subsequent collection and processing of a number of triple resonance spectra (Yamazaki *et al* (1994)). Here, for each backbone nucleus we report residue number, amino acid type and chemical shift values for H, N, C, CA and CB chemical groups. This data is also deposited in the Biological Magnetic Resonance Data Bank (BioMagResBank) with accession number 27838.

| Residue No. | Amino acid | H (ppm) | N (ppm) | C (ppm) | CA (ppm) | CB (ppm) |
|-------------|------------|---------|---------|---------|----------|----------|
| -4          | Gly        | -       | -       | 174.04  | 45.33    | -        |
| -3          | Leu        | 7.90    | 121.86  | 177.29  | 55.20    | 41.84    |
| -2          | Val        | 7.92    | 122.62  | 174.59  | 59.80    | 32.31    |
| -1          | Pro        | -       | -       | 177.09  | 63.14    | 31.70    |
| 0           | Arg        | 8.32    | 122.19  | -       | 56.42    | 30.39    |
| 1           | Gly        | 8.34    | 110.56  | -       | 45.38    | -        |
| 2           | Ser        | -       | -       | -       | -        | -        |
| 3           | His        | -       | -       | 175.48  | 56.69    | 30.37    |
| 4           | Met        | 7.93    | 121.51  | 175.65  | 55.40    | 32.65    |
| 5           | Ala        | 8.06    | 124.98  | 177.43  | 52.32    | 18.92    |
| 6           | His        | 8.13    | 119.59  | 175.81  | 56.37    | 30.84    |
| 7           | Gln        | 8.72    | 122.81  | -       | 54.23    | 28.64    |
| 8           | Pro        | -       | -       | 178.02  | 66.57    | 31.66    |
| 9           | Ser        | 8.23    | 110.83  | 176.28  | 62.13    | 62.34    |
| 10          | Asp        | 7.60    | 123.05  | 179.66  | 57.50    | 40.58    |
| 11          | Thr        | 7.66    | 119.96  | 175.24  | 67.06    | 68.63    |
| 12          | Ile        | 7.37    | 120.06  | 177.29  | 61.51    | 35.64    |
| 13          | Ala        | 7.98    | 123.20  | 181.59  | 55.66    | 17.61    |
| 14          | Gly        | 7.87    | 105.10  | 175.79  | 46.51    | -        |
| 15          | Leu        | 7.82    | 125.58  | 177.58  | 58.15    | 41.43    |
| 16          | Tyr        | 7.16    | 114.80  | 178.17  | 64.72    | 36.93    |
| 17          | Glu        | 7.56    | 119.58  | 179.11  | 59.68    | 29.09    |
| 18          | Ala        | 7.86    | 123.09  | 180.63  | 54.99    | 16.24    |
| 19          | Phe        | -       | -       | 179.73  | 61.70    | 38.04    |
| 20          | Asn        | 8.16    | 118.23  | 177.36  | 55.81    | 37.37    |
| 21          | Ser        | 7.89    | 113.21  | 175.29  | 58.51    | 64.67    |
| 22          | Gly        | 7.97    | 113.72  | 174.57  | 46.96    | -        |

|    |     |      |        |        |       |       |
|----|-----|------|--------|--------|-------|-------|
| 23 | Asp | 8.07 | 119.52 | 175.24 | 52.31 | 39.22 |
| 24 | Leu | 7.77 | 125.86 | 178.52 | 57.68 | 41.40 |
| 25 | Glu | 7.99 | 117.65 | 180.08 | 59.66 | 28.57 |
| 26 | Thr | 7.33 | 118.49 | 176.72 | 66.44 | 66.94 |
| 27 | Leu | 7.52 | 121.95 | 178.09 | 58.79 | 40.57 |
| 28 | Arg | 7.46 | 113.79 | 176.75 | 59.78 | 29.00 |
| 29 | Glu | 7.14 | 117.51 | 179.07 | 58.20 | 29.75 |
| 30 | Leu | 7.57 | 117.25 | 175.74 | 56.10 | 43.06 |
| 31 | Ile | 7.25 | 118.06 | 175.23 | 60.18 | 39.99 |
| 32 | Ala | 8.37 | 130.10 | 177.05 | 51.66 | 17.26 |
| 33 | Pro | -    | -      | 177.79 | 65.26 | 30.70 |
| 34 | Asp | 8.36 | 115.01 | 175.81 | 51.93 | 38.52 |
| 35 | Ala | 7.28 | 122.38 | 176.03 | 52.73 | 20.86 |
| 36 | Val | 7.20 | 120.34 | 173.99 | 62.23 | 32.01 |
| 37 | Ile | 8.52 | 126.60 | 174.87 | 57.93 | 35.08 |
| 38 | His | 9.03 | 128.63 | 174.65 | 53.67 | 26.98 |
| 39 | Leu | 7.73 | 125.01 | 174.92 | 52.28 | 40.30 |
| 40 | Pro |      |        |        |       |       |
| 41 | Gly | -    | -      | 175.86 | 48.02 | -     |
| 42 | Thr | 7.40 | 111.56 | 174.97 | 63.30 | 68.94 |
| 43 | Ala | 7.99 | 123.86 | 178.37 | 51.88 | 19.58 |
| 44 | Gly | 7.75 | 107.81 | 172.24 | 45.30 | -     |
| 45 | Asp | 8.03 | 121.11 | 176.72 | 53.33 | 41.48 |
| 46 | Ala | 8.19 | 120.72 | 179.41 | 55.27 | 18.20 |
| 47 | Glu | 7.72 | 114.63 | 175.88 | 57.15 | 29.95 |
| 48 | His | 7.81 | 117.86 | 171.78 | 53.23 | 28.51 |
| 49 | Pro |      |        |        |       |       |
| 50 | Pro | -    | -      | 176.73 | 64.33 | 32.05 |
| 51 | Gly | 9.15 | 114.26 | 175.36 | 45.24 | -     |
| 52 | Thr | 8.05 | 117.48 | 173.91 | 60.49 | 69.73 |
| 53 | Pro | -    | -      | 175.55 | 63.02 | 32.60 |
| 54 | Arg | 8.66 | 117.47 | 175.00 | 51.82 | 32.01 |
| 55 | Asp | 7.63 | 119.65 | 176.88 | 51.43 | 41.42 |
| 56 | Arg | -    | -      | 177.99 | 61.10 | 30.60 |
| 57 | Glu | 8.39 | 116.31 | 180.62 | 58.95 | 28.00 |

|    |     |      |        |        |       |       |
|----|-----|------|--------|--------|-------|-------|
| 58 | Gly | 8.61 | 111.15 | 175.95 | 47.11 | -     |
| 59 | Trp | 8.38 | 124.21 | 177.96 | 58.30 | 29.66 |
| 60 | Leu | 8.73 | 117.42 | 180.22 | 58.62 | 39.48 |
| 61 | Gly | 8.21 | 107.43 | 176.98 | 47.38 | -     |
| 62 | Val | 7.94 | 125.70 | 179.61 | 66.65 | 31.66 |
| 63 | Trp | 8.94 | 124.39 | 178.19 | 61.84 | 27.65 |
| 64 | Gln | 8.47 | 118.74 | 178.85 | 59.40 | 29.01 |
| 65 | Phe | 8.00 | 121.18 | 177.38 | 60.90 | 38.87 |
| 66 | Thr | 7.94 | 115.12 | 176.78 | 66.75 | 69.10 |
| 67 | Gln | 8.13 | 122.32 | 177.19 | 57.42 | 27.47 |
| 68 | Ala | 6.92 | 117.93 | 179.54 | 53.91 | 17.46 |
| 69 | Phe | 6.89 | 114.37 | 174.21 | 59.41 | 40.02 |
| 70 | Phe | 7.11 | 113.89 | 173.76 | 54.48 | 40.53 |
| 71 | Pro | -    | -      | 178.28 | 65.19 | 31.42 |
| 72 | Asp | 7.78 | 115.77 | 176.56 | 52.32 | 40.14 |
| 73 | Met | 8.02 | 122.13 | 177.47 | 56.95 | 33.56 |
| 74 | Thr | 8.81 | 118.59 | 173.54 | 60.01 | 73.56 |
| 75 | Ala | 9.47 | 124.58 | 176.80 | 51.05 | 20.65 |
| 76 | Thr | 8.27 | 117.87 | 175.11 | 61.09 | 70.65 |
| 77 | Val | 9.02 | 129.47 | 175.80 | 64.05 | 31.61 |
| 78 | Gln | 9.01 | 126.59 | 174.91 | 55.92 | 30.03 |
| 79 | Asp | 7.05 | 115.50 | 174.43 | 54.20 | 46.86 |
| 80 | Ile | 8.41 | 120.33 | 173.61 | 60.33 | 41.03 |
| 81 | Val |      |        |        |       |       |
| 82 | Gln | -    | -      | 176.30 | 54.45 | 32.36 |
| 83 | Thr | 8.64 | 122.20 | 174.24 | 63.99 | 73.92 |
| 84 | Gly | -    | -      | 174.23 | 47.69 | -     |
| 85 | Asp | 8.48 | 126.47 | 174.29 | 53.77 | 40.35 |
| 86 | Leu | 7.81 | 119.74 | 176.27 | 45.95 | -     |
| 87 | Val | -    | -      | 175.57 | 59.67 | 35.40 |
| 88 | Ala | 9.78 | 133.37 | 176.11 | 50.19 | 23.20 |
| 89 | Thr | 8.55 | 109.38 | 173.53 | 58.48 | 73.17 |
| 90 | Arg | -    | -      | 175.91 | 54.58 | 33.39 |
| 91 | Cys | 9.12 | 123.35 | 173.15 | 54.58 | 30.78 |
| 92 | Val | 8.24 | 119.76 | 174.91 | 60.63 | 34.01 |

|     |     |      |        |        |       |       |
|-----|-----|------|--------|--------|-------|-------|
| 93  | Ala | 9.52 | 134.14 | 175.79 | 50.00 | 19.79 |
| 94  | Arg | 8.48 | 121.00 | 174.35 | 54.08 | 34.24 |
| 95  | Gly | -    | -      | 171.41 | 44.82 | -     |
| 96  | Thr | 9.68 | 115.74 | 174.94 | 61.40 | 71.55 |
| 97  | His | 8.53 | 123.56 | 174.35 | 53.59 | 31.47 |
| 98  | Ser | 8.43 | 122.87 | 173.89 | 59.19 | 65.37 |
| 99  | Ile | 8.41 | 125.66 | 175.03 | 59.80 | 40.59 |
| 100 | Glu | 8.53 | 125.98 | 175.08 | 58.14 | 29.53 |
| 101 | Phe | 7.82 | 125.57 | 174.38 | 56.73 | 42.21 |
| 102 | Met | 8.62 | 123.91 | 175.85 | 56.31 | 29.46 |
| 103 | Gly | 8.41 | 103.47 | 174.42 | 45.25 | -     |
| 104 | Val | 8.03 | 124.48 | 174.54 | 60.09 | 31.99 |
| 105 | Pro |      |        |        |       |       |
| 106 | Pro | -    | -      | 177.66 | 62.59 | 32.13 |
| 107 | Thr | 6.60 | 110.14 | 177.01 | 61.38 | 72.52 |
| 108 | Gly | 8.73 | 112.17 | 173.85 | 45.52 |       |
| 109 | Arg | 8.01 | 120.74 | 174.70 | 55.26 | 30.39 |
| 110 | Pro | -    | -      | 176.38 | 61.62 | 32.53 |
| 111 | Phe | 7.96 | 115.45 | 174.33 | 55.67 | 42.48 |
| 112 | Glu | 9.10 | 120.56 | 175.12 | 55.64 | 32.91 |
| 113 | Met | 9.26 | 123.62 | 174.43 | 54.40 | 36.13 |
| 114 | Thr | 9.55 | 124.38 | 172.59 | 64.44 | 69.14 |
| 115 | Met | 8.41 | 125.60 | 174.37 | 54.82 | 37.37 |
| 116 | Leu | 8.25 | 124.77 | 174.31 | 53.55 | 44.50 |
| 117 | Asn | 8.47 | 115.81 | 174.68 | 50.74 | -     |
| 118 | Met | 8.99 | 122.43 | 174.06 | -     | -     |
| 119 | Ser |      |        |        |       |       |
| 120 | Arg | -    | -      | 175.77 | 54.85 | 32.57 |
| 121 | Val | 9.10 | 129.23 | 175.40 | 60.64 | 33.91 |
| 122 | Arg | 9.15 | 126.78 | 176.04 | 55.21 | 33.35 |
| 123 | Asp | 9.53 | 128.67 | 176.00 | 55.52 | 39.73 |
| 124 | Gly | 8.53 | 102.58 | 173.85 | 45.71 | -     |
| 125 | Arg | 7.53 | 117.36 | 175.53 | 53.70 | 33.97 |
| 126 | Ile | 9.26 | 122.17 | 176.46 | 62.70 | 38.94 |
| 127 | Val | 8.55 | 122.20 | 177.35 | -     | -     |



|     |     |      |        |        |       |       |
|-----|-----|------|--------|--------|-------|-------|
| 128 | Glu |      |        |        |       |       |
| 129 | His |      |        |        |       |       |
| 130 | Trp |      |        |        |       |       |
| 131 | Thr | 7.12 | 114.64 | 171.65 | 58.68 | 68.65 |
| 132 | Ile | 8.43 | 126.25 | 173.76 | 62.87 | 41.98 |
| 133 | Ser | 7.66 | 119.62 | 174.38 | 57.04 | 66.24 |
| 134 | Asp | 8.33 | 122.55 | 175.76 | 52.19 | 38.26 |
| 135 | Asn | 8.20 | 122.30 | 177.01 | 57.09 | 38.55 |
| 136 | Val | 8.61 | 119.08 | 178.54 | 67.14 | 31.18 |
| 137 | Thr | 6.90 | 119.05 | 176.34 | 66.64 | 67.12 |
| 138 | Met | 6.86 | 121.67 | 177.19 | 59.81 | 32.31 |
| 139 | Leu | 8.05 | 117.78 | 179.67 | 58.27 | 40.01 |
| 140 | Ala | 7.93 | 121.99 | 181.95 | 54.94 | 17.65 |
| 141 | Gln | 7.92 | 119.45 | 178.82 | 58.71 | 28.39 |
| 142 | Leu | 7.60 | 117.47 | 177.13 | 55.64 | 42.13 |
| 143 | Gly | 7.67 | 106.00 | 174.80 | 45.72 | -     |
| 144 | Val | 7.70 | 120.55 | 175.39 | 62.14 | 32.58 |
| 145 | Lys | 8.18 | 126.50 | 175.78 | 55.82 | 32.82 |
| 146 | Ala | 8.07 | 126.21 | 177.19 | 52.24 | 19.63 |
| 147 | Ser | 8.08 | 115.92 | 173.48 | 58.14 | 64.47 |
| 148 | Leu | 7.67 | 129.54 | 182.23 | 56.89 | 42.88 |
